# Supplementary material
Source: PubMed Central journal article supplement (PMC7164523)
Supplement: glz114_suppl_supplementary_figure.pdf [file glz114_suppl_supplementary_figure.pdf]

## Subject Fall Report Form

Subject Name: \_\_\_\_\_ Subject ID: \_\_\_\_\_

Date of Fall: \_\_\_/\_\_\_/\_\_\_ Date is:    Exact    Approximate  
                  M      D      Y

General Description of Fall:

1) Where did the fall occur?

At home

Away from home, but indoors

Outdoors

Uncertain

Other: \_\_\_\_\_

2) What was the cause of the fall? (Check all that apply)

Slip/trip

Lost my balance

Stairs/step

Uneven surface

Light-headed/faint

Vertigo/spinning

Overexertion/exercise

Distracted

Uncertain

Other: \_\_\_\_\_

3) What was the approximate time of the fall?

\_\_\_\_\_

4) What was the lighting?

Well-lit

Dark or low light

Uncertain

5) Were there any injuries? (Check all that apply)

No injuries

Stiffness/soreness/back pain

Cut or bruise

Head injury

Sprain

Fracture

Uncertain

Other: \_\_\_\_\_

Subject Name: \_\_\_\_\_ Subject ID: \_\_\_\_\_

6) Did you see a healthcare professional because of the fall? (Check all that apply)

|                     |                 |
|---------------------|-----------------|
| No                  | Doctor's office |
| Home/facility nurse | Uncertain       |
| Paramedic/ambulance | Other: _____    |
| Emergency room (ER) |                 |

7) Did you require treatment? (Check all that apply)

|                           |                                                     |
|---------------------------|-----------------------------------------------------|
| No                        | Medication (pain medicines, muscle relaxants, etc.) |
| Bandage (dressing, etc.)  | Uncertain                                           |
| Stitches                  | Other: _____                                        |
| Cast/boot/splint/ACE wrap |                                                     |
| Hospitalization           |                                                     |

8) Did you have any visitors during the first week after the fall?

No  
Yes  
  
Uncertain

9) Are you walking differently after the fall? (Check all that apply)

|                       |                            |
|-----------------------|----------------------------|
| No change             | Now using a cane or walker |
| Slowly and cautiously | Uncertain                  |
| Limping               | Other: _____               |

Any additional comments:
